# Supplementary material for: Sensitive chemiluminescence determination method for 2,4,6-trinitrotoluene based on the catalytic activity of amine-capped gold nanoparticles
Source: Royal Society of Chemistry journal article supplement (doi:10.1039/c6nj02324j), 2016-11-22
Supplement: c6nj02324j1.pdf [file c6nj02324j1.pdf]

## Electronic Information

### **Sensitive chemiluminescence determination method for 2,4,6-trinitrotoluene based on catalytic activity of amine-capped gold nanoparticles**

Javad Hassanzadeh,<sup>a</sup> Alireza Khataee,<sup>a,b,\*</sup> Nafiseh Bagheri,<sup>c</sup> Roya Lotfi<sup>a</sup>

---

<sup>a</sup> Research Laboratory of Advanced Water and Wastewater Treatment Processes, Department of Applied Chemistry, Faculty of Chemistry, University of Tabriz, 51666-16471 Tabriz, Iran

<sup>b</sup> Department of Materials Science and Nanotechnology, Near East University, 99138 Nicosia, North Cyprus, Mersin 10, Turkey

<sup>c</sup> Department of Chemistry, Faculty of Science, Azarbaijan Shahid Madani University, Tabriz, Iran

\* Corresponding author:

E-mail: a\_khataee@tabrizu.ac.ir

Tel.: +98 41 33393165; Fax: +98 41 33340191

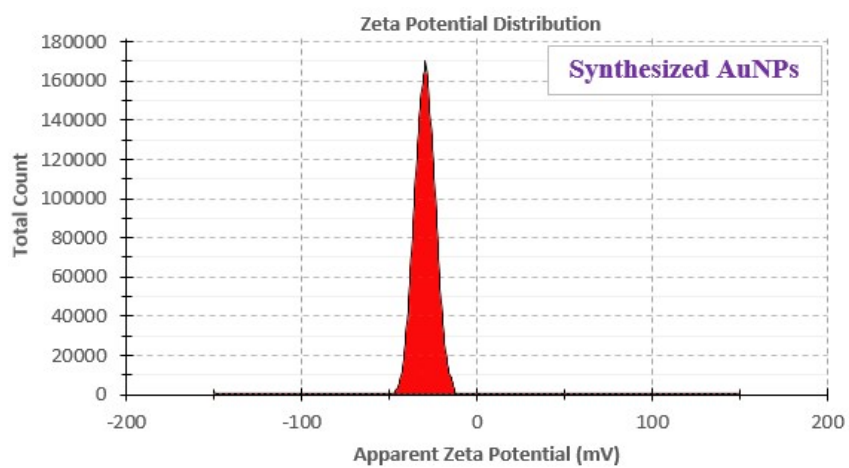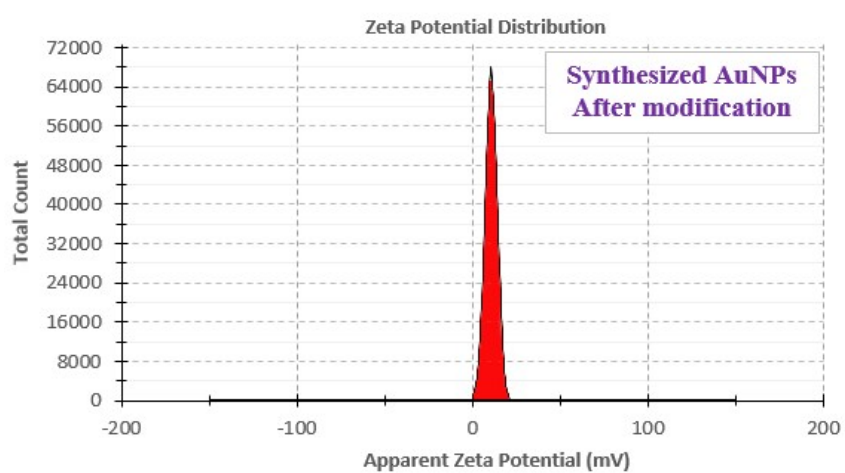

*Figure S1. Zeta potential distribution for AuNPs before and after their modification with 1,2-ethylenediamine.*

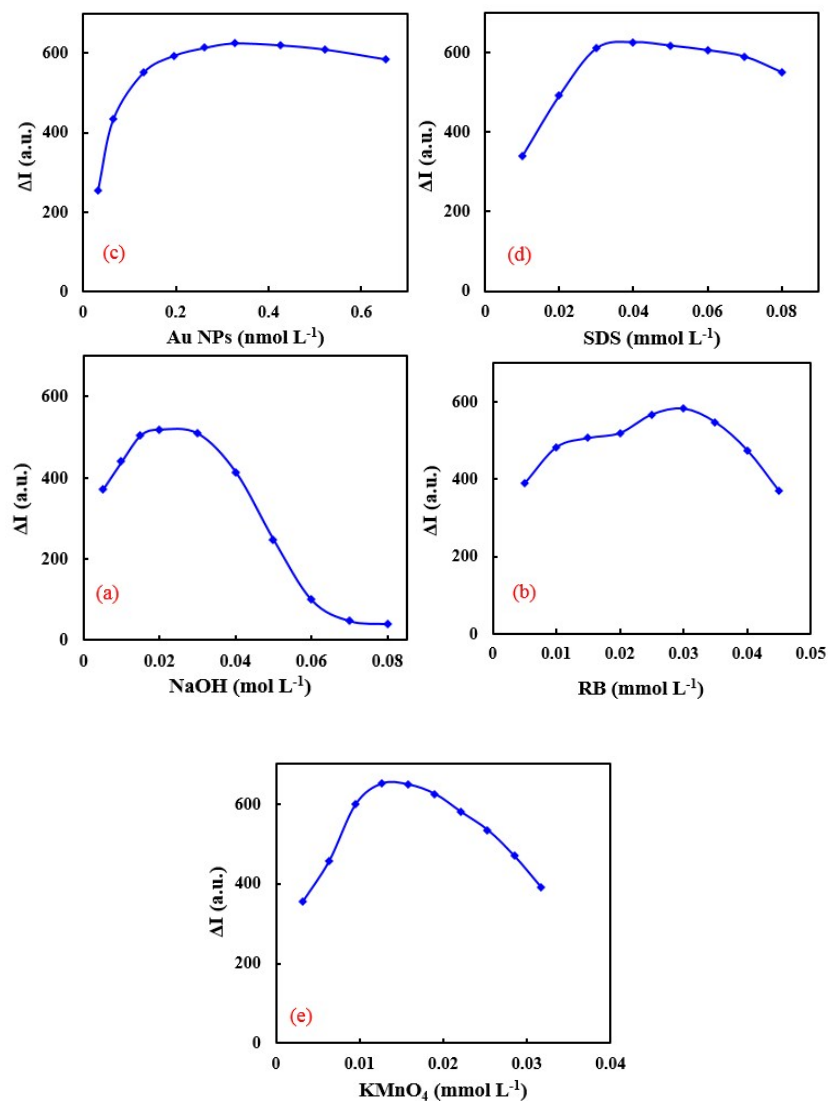

**Figure S2.** Effect of (a) concentration of NaOH (0.02 mmol L<sup>-1</sup> RB, 0.04 mmol L<sup>-1</sup> SDS, 0.019 mmol L<sup>-1</sup> KMnO<sub>4</sub> and 400  $\mu$ L AuNPs); (b) concentration of RB (0.04 mmol L<sup>-1</sup> SDS, 0.02 mmol L<sup>-1</sup> NaOH, 0.019 mmol L<sup>-1</sup> KMnO<sub>4</sub> and 400  $\mu$ L AuNPs); (c) amount of AuNPs (0.03 mmol L<sup>-1</sup> RB, 0.04 mmol L<sup>-1</sup> SDS, 0.02 mmol L<sup>-1</sup> NaOH and 0.019 mmol L<sup>-1</sup> KMnO<sub>4</sub>); (d) concentration of SDS (0.03 mmol L<sup>-1</sup> RB, 0.02 mol L<sup>-1</sup> NaOH, 0.019 mmol L<sup>-1</sup> KMnO<sub>4</sub> and 1000  $\mu$ L AuNPs) and (e) concentration of KMnO<sub>4</sub> (0.03 mmol L<sup>-1</sup> RB, 0.04 mmol L<sup>-1</sup> SDS, 0.02 mmol L<sup>-1</sup> NaOH and 1000  $\mu$ L AuNPs) on the CL intensity.
